# Supplementary material for: The Oncolytic Virus dl922-947 Triggers Immunogenic Cell Death in Mesothelioma and Reduces Xenograft Growth
Source: PubMed Central journal article supplement (PMC6639422; doi:10.3389/fonc.2019.00564), 2019-07-12

Figure 1

24 h

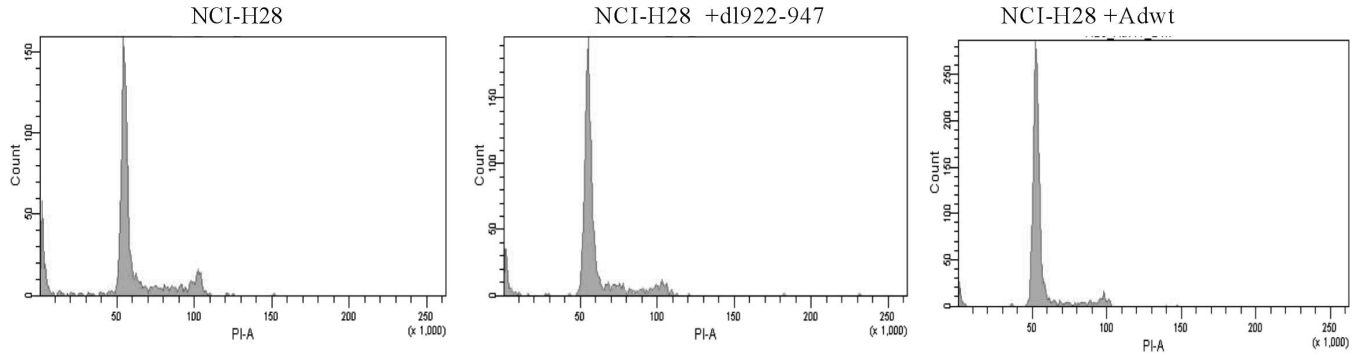

48 h

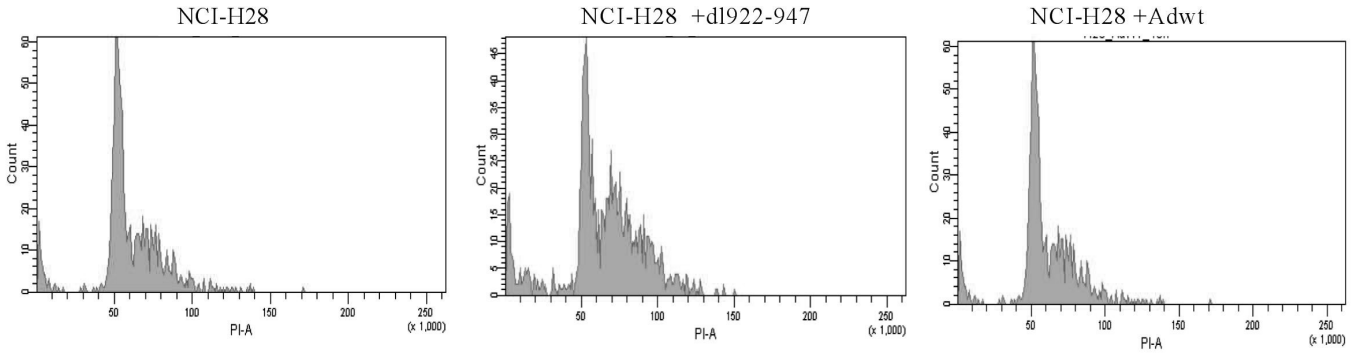

72 h

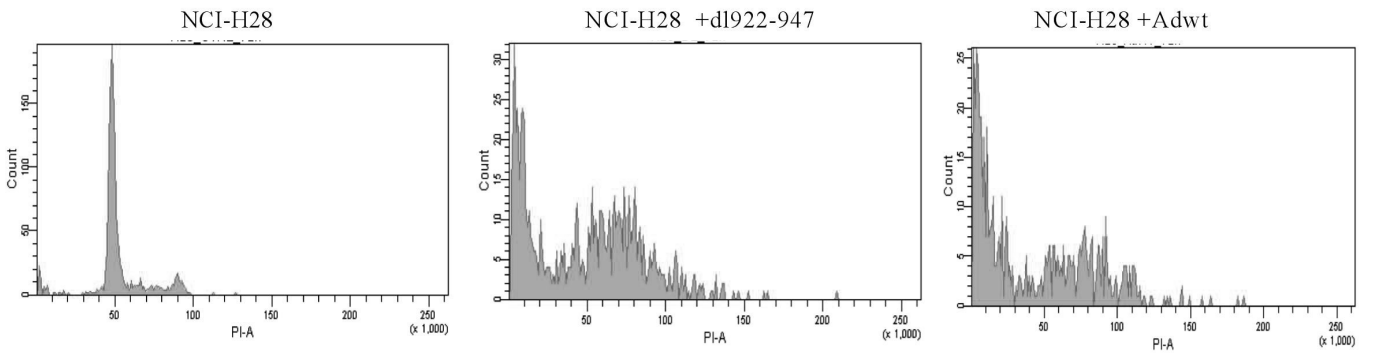

Figure 2

A

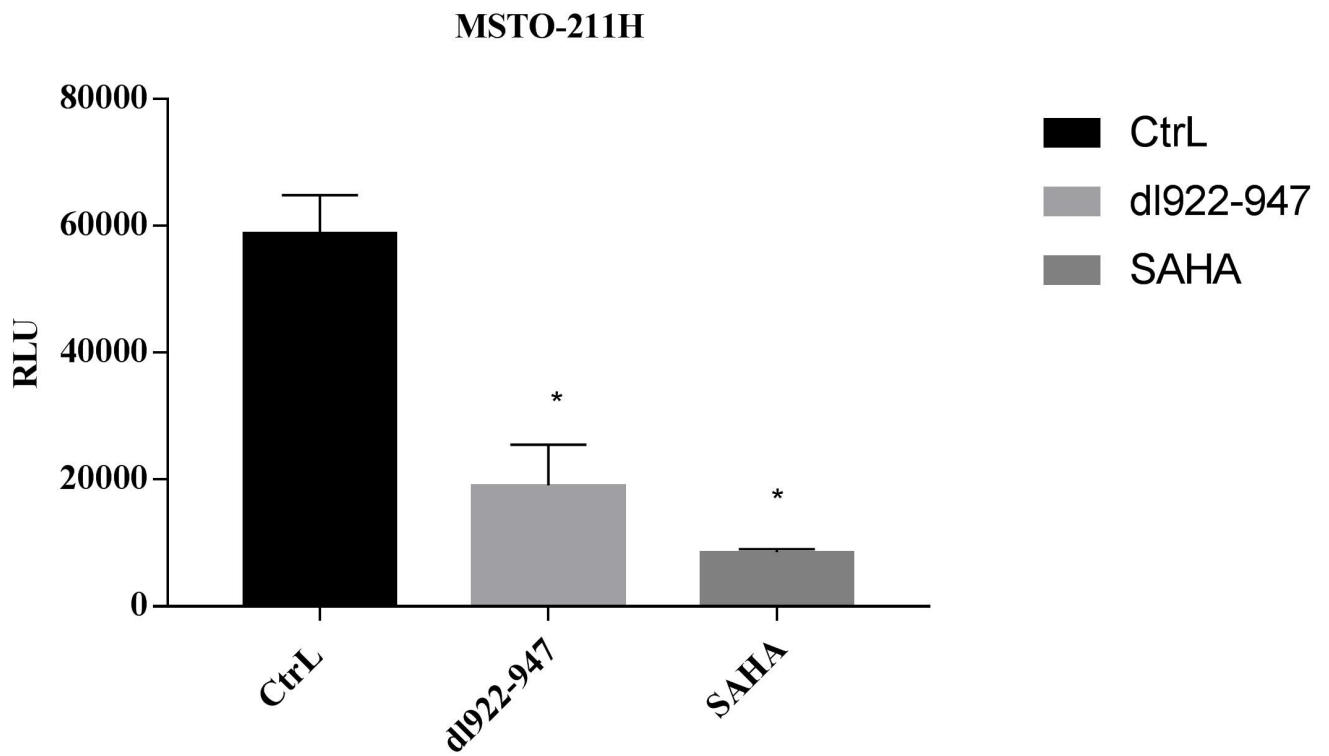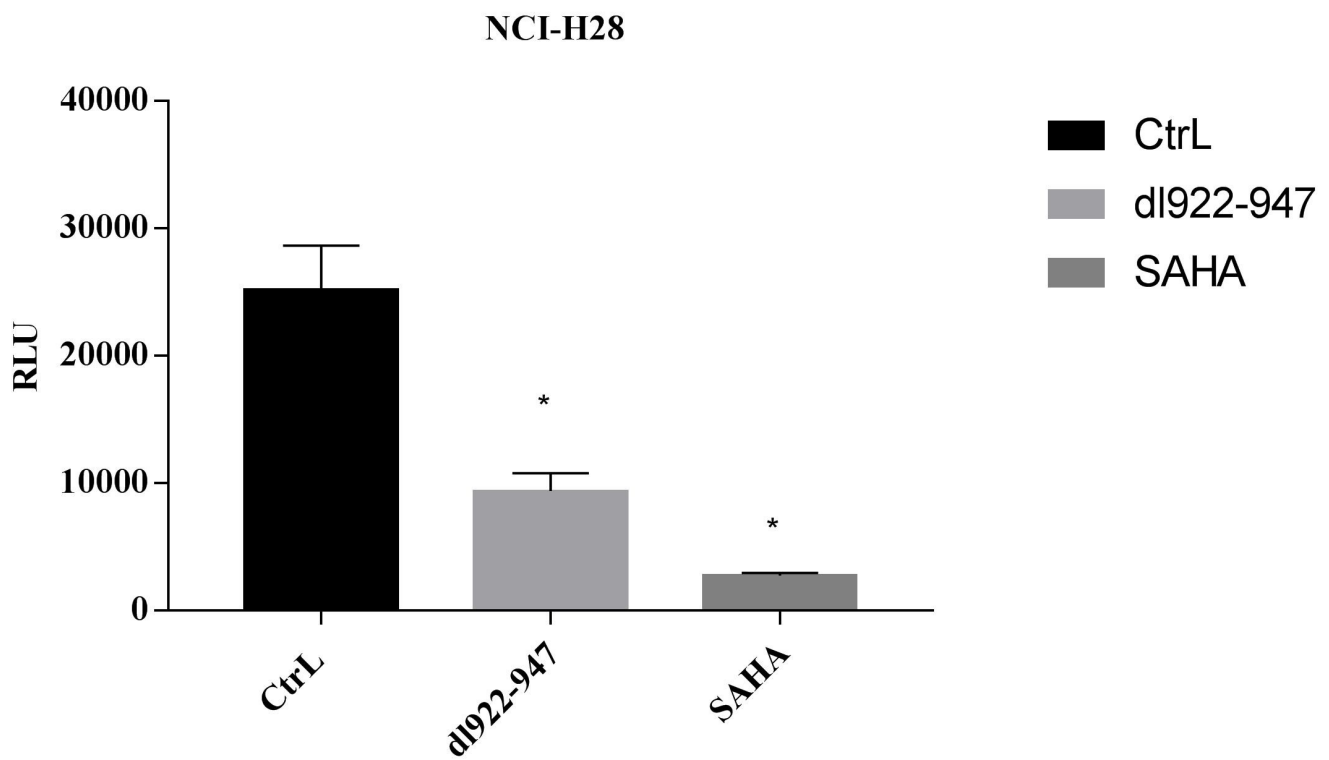

**B**

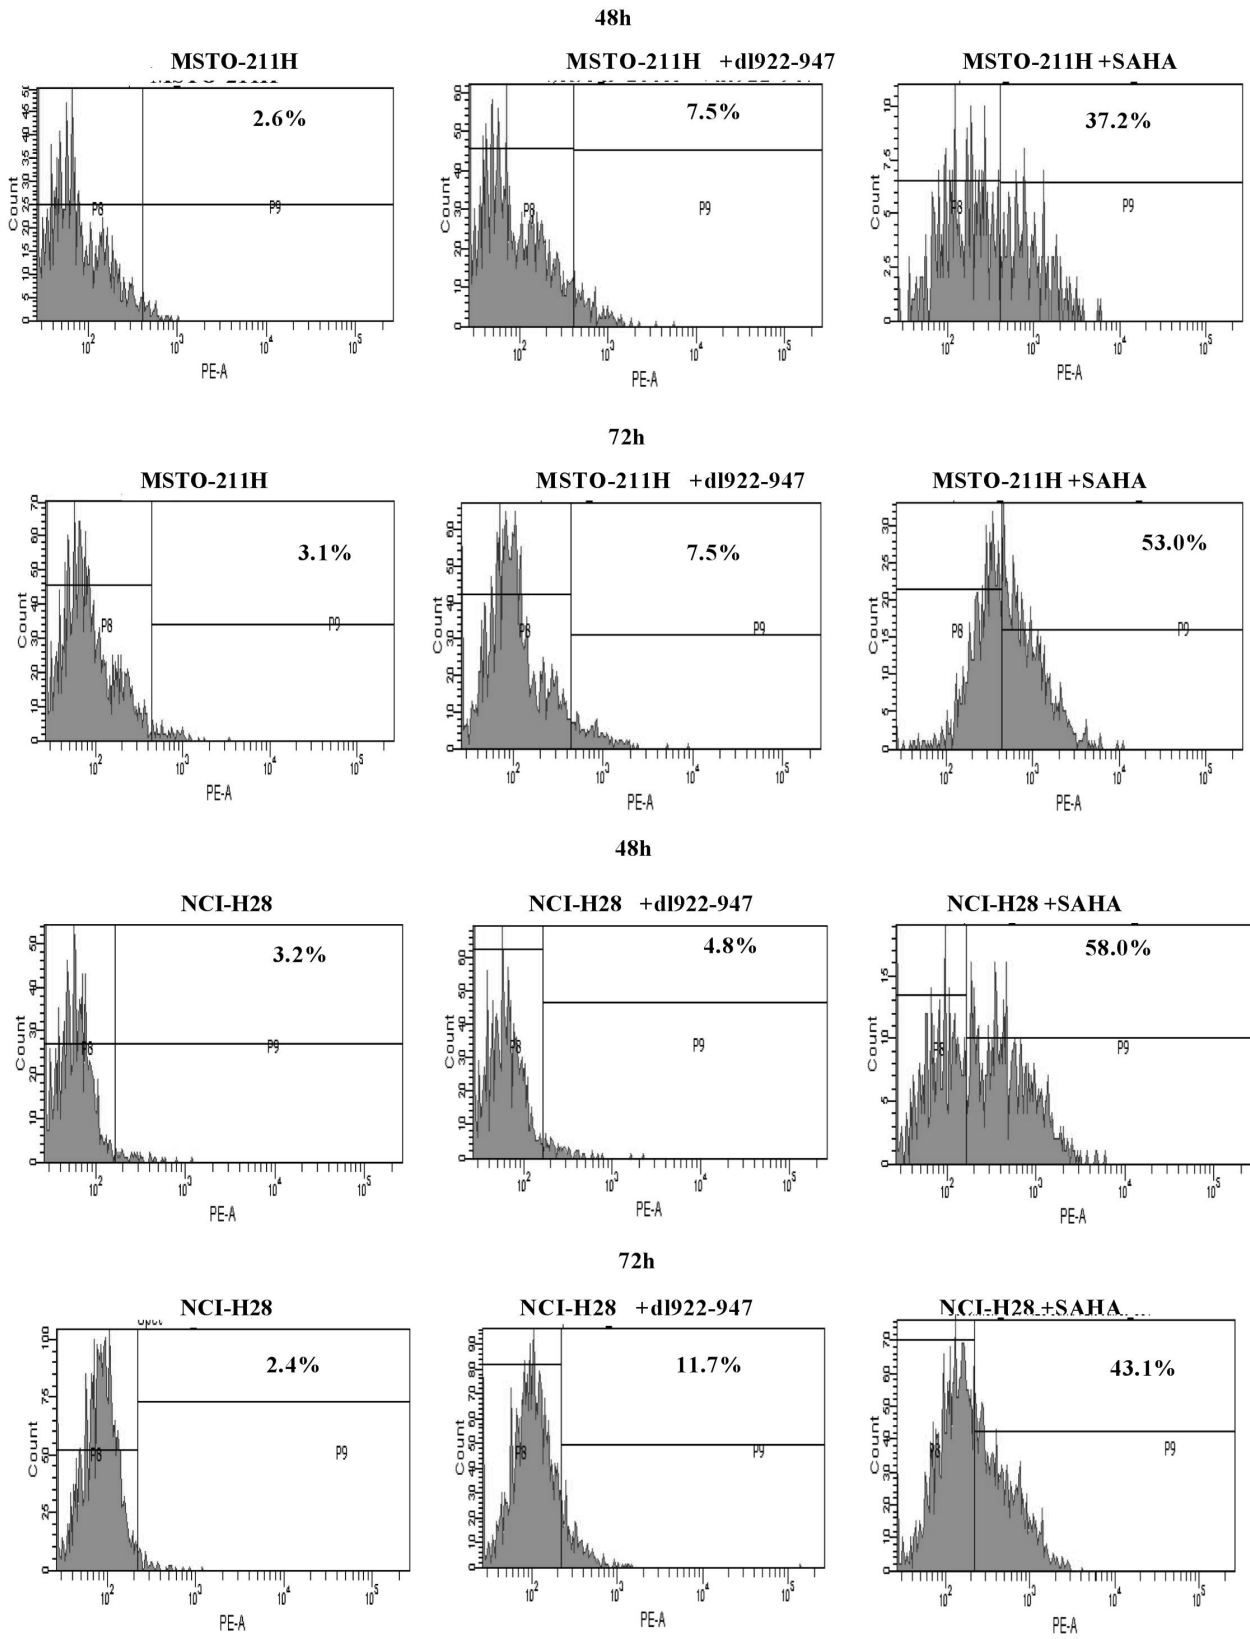

C

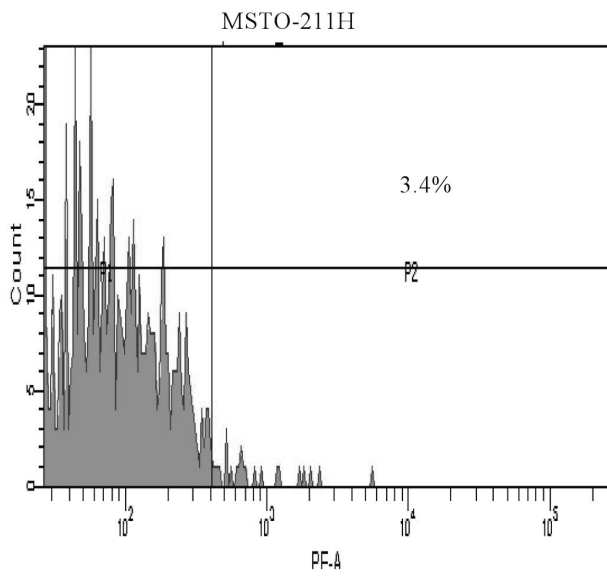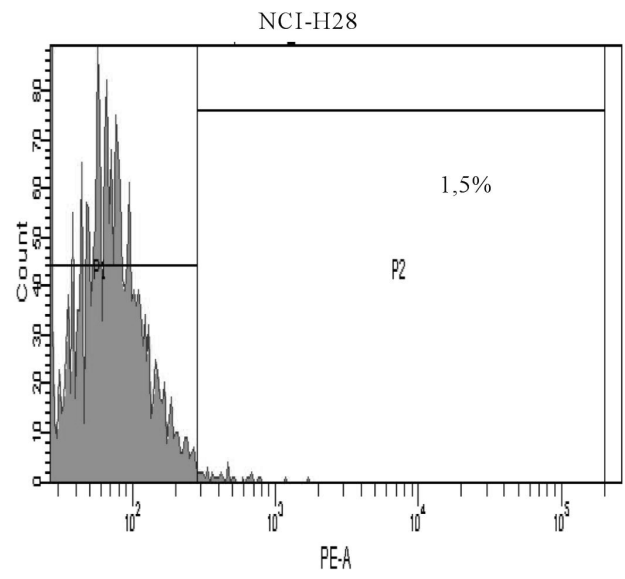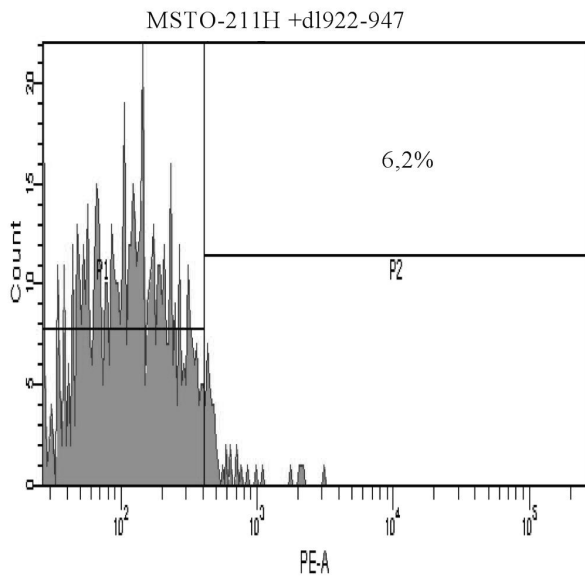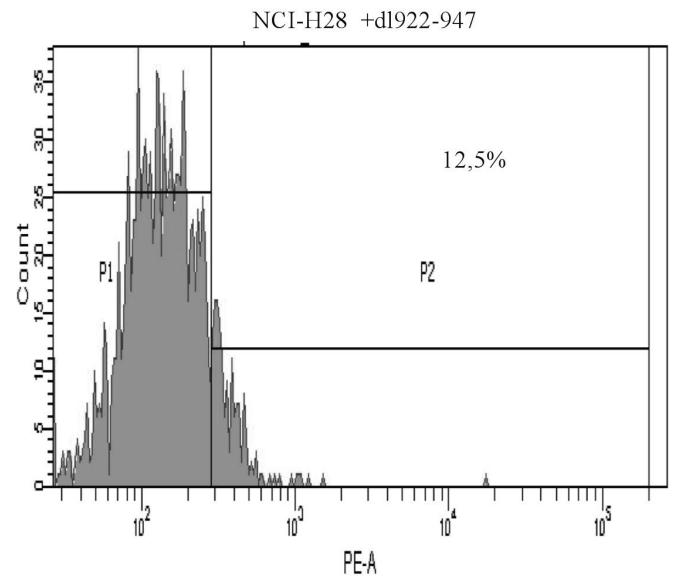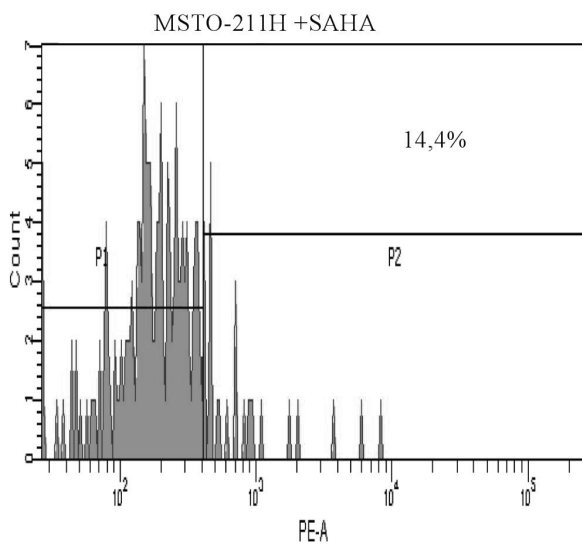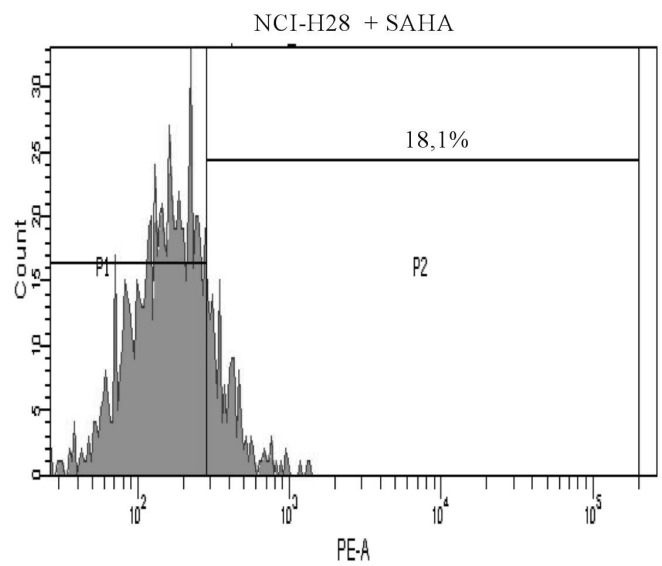

Supplement: Data_Sheet_2.pdf [file Data_Sheet_2.pdf]
